# Supplementary material for: The Effect of E. coli Uridine-Cytidine Kinase Gene Deletion on Cytidine Synthesis and Transcriptome Analysis
Source: MDPI journal article supplement (doi:10.3390/fermentation8110586), 2022-10-29
Supplement: s1 [file s1]

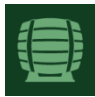

## Article

# The Effect of *E. coli* Uridine-Cytidine Kinase Gene Deletion on Cytidine Synthesis and Transcriptome Analysis

Table S1. Plasmids and strains used in this experiment.

|                           | Description                                                                                    | Source     |
|---------------------------|------------------------------------------------------------------------------------------------|------------|
| Strains                   |                                                                                                |            |
| <i>E. coli</i> K12 MG1655 | Wild-type, starting strain                                                                     | Lab stock  |
| <i>E. coli</i> NXBG-11    | <i>E. coli</i> K12 MG1655, $\Delta cdd\Delta poxB$                                             | Lab stock  |
| <i>E. coli</i> NXBG-12    | <i>E. coli</i> NXBG-11, $\Delta udk$                                                           | This study |
| Plasmids                  |                                                                                                |            |
| pCas                      | repA101(Ts)kan Pcas-cas9 P <sub>araB</sub> -Red lacI <sup>q</sup> P <sub>trc</sub> -sgRNA-pMB1 | Lab stock  |
| pTargetF                  | pMB1 aadA sgRNA                                                                                | Lab stock  |
| pTargetF- <i>udk</i>      | pMB1 aadA sgRNA- <i>udk</i>                                                                    | This study |

Table S2. Primers used in this experiment.

| Primer name         | Primer sequence (5' - 3')                                                   | Size (bp) |
|---------------------|-----------------------------------------------------------------------------|-----------|
| gRNA- <i>udk</i> -S | GTCCTAGGTATAATACTAGT <u>GCCGACACGTTAGTGC-TACIGTTTTAGAGCTAGAAATAGC</u>       | 60        |
| gRNA- <i>udk</i> -A | TTCAAAAAAAGCACCGACTCGG                                                      | 22        |
| <i>udk</i> -Up-S    | <u>CCGAGTCGGTGCTTTTTTTGAAGATGGACGTCGGGAAC-CACAGTG</u>                       | 45        |
| <i>udk</i> -Up-A    | AGTCATATATTTAGCGACCTGATTAACTGGAT                                            | 33        |
| <i>udk</i> -Down-S  | <u>ATCCAGGTTAATCAGGTCGCTAAATATATGACTGAATAA-GCTTGATAAATTGTGTACCGTTCAGTGA</u> | 67        |
| <i>udk</i> -Down-A  | ACGCGTCGACGTGACGTGCACCATCAGCCCC                                             | 31        |
| Reserved            |                                                                             |           |
| Basic groups        | Up 6 bp, Down 6 bp, Total 12 bp                                             |           |
| <i>udk</i> -S       | ATCCAGGTTAATCAGGTCG                                                         | 19        |
| <i>udk</i> -A       | ACGCCAATTACGTCAAGG                                                          | 18        |

Table S3. Sequencing results after *udk* knockout.

|                                                                     |
|---------------------------------------------------------------------|
| GCGCGCGGCAACGCTATTCGACTGGTATCAGACGGATGAAATCCCTATAATT-GCCGCGTTT-     |
| GGCGCTTCGTCGCCCCCTTCCTAACATCCAGGTTAATCAGGTCGCTAAATATATG             |
| <u>ACTGAATAA</u> GCTTGATAAATTGTGTACCGTTCAGTGATAACCTAG-TATGCCCTTGAC- |
| GTAATTGGCGTTAAGGGAGTGATGCGCGAAAGGAGAAAATGCCAT.....                  |

Note: The bold part in italics is the primer *udk*-Up-R for amplifying the upstream homologous arm, the curve part is the primer *udk*-Down-F for amplifying the downstream homologous arm, and the box part is the part of *udk* gene that has not been replaced (12 bp).

**Table S4.** Sequencing data quality control comparison results.

| Sample Name             | Clean Reads | Clean Bases (bp) | Clean Q20(%) | Clean Q30(%) | Clean Error Rate (%) |
|-------------------------|-------------|------------------|--------------|--------------|----------------------|
| <i>E.coli</i> NXBG-11-1 | 28,838,430  | 3,778,764,509    | 98.71        | 95.84        | 0.0233               |
| <i>E.coli</i> NXBG-11-2 | 29,581,342  | 3,907,767,386    | 98.69        | 95.81        | 0.0234               |
| <i>E.coli</i> NXBG-11-3 | 28,649,950  | 3,775,960,309    | 98.7         | 95.88        | 0.0233               |
| <i>E.coli</i> NXBG-12-1 | 28,908,080  | 3,774,609,345    | 98.9         | 96.25        | 0.0229               |
| <i>E.coli</i> NXBG-12-2 | 29,459,504  | 3,859,114,392    | 98.87        | 96.2         | 0.023                |
| <i>E.coli</i> NXBG-12-3 | 26,958,152  | 3,509,871,257    | 98.86        | 96.14        | 0.023                |

**Table S5.** Sequencing data quality control comparison results.

| Sample Name             | Total reads | Genome Mapped reads and Ratio (%) | Uniquely Mapped Reads Ratio(%) |
|-------------------------|-------------|-----------------------------------|--------------------------------|
| <i>E.coli</i> NXBG-11-1 | 28,838,430  | 28,548,836 (98.99)                | 97.9                           |
| <i>E.coli</i> NXBG-11-2 | 29,581,342  | 29,326,377 (99.13)                | 98.2                           |
| <i>E.coli</i> NXBG-11-3 | 28,649,950  | 28,396,298 (99.11)                | 98.19                          |
| <i>E.coli</i> NXBG-12-1 | 28,908,080  | 22,452,908 (77.67)                | 76.35                          |
| <i>E.coli</i> NXBG-12-2 | 29,459,504  | 22,921,939 (77.81)                | 76.62                          |
| <i>E.coli</i> NXBG-12-3 | 26,958,152  | 20,962,379 (77.76)                | 76.62                          |

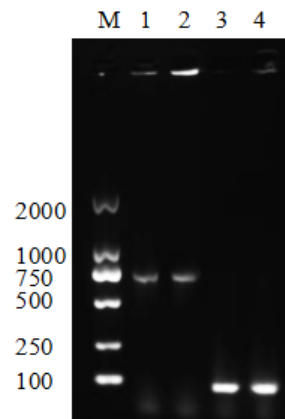**Figure S1.** Verification results after the removal of *udk*.

Note: M DNA standard DL2000; Lanes 1-2 are the PCR products before *udk* knockdown (728 bp), and lanes 3-4 are the PCR products after *udk* knockout (86 bp).
